# Supplementary material for: Specialists’ Dual Practice within Public Hospital Setting: Evidence from Malaysia
Source: MDPI journal article supplement (doi:10.3390/healthcare10102097), 2022-10-20
Supplement: s1 [file s1]

**Table S1.** Percentage of specialists' participation in FPP Service in ten FPP hospitals, 2015-2017.

| Year | Total no. of specialists<br>in 10 hospitals | Total no. of FPP<br>specialists | Percentage (%) |
|------|---------------------------------------------|---------------------------------|----------------|
| 2015 | 1116                                        | 241                             | 21.6           |
| 2016 | 1167                                        | 235                             | 27.0           |
| 2017 | 1157                                        | 342                             | 29.6           |

Source: National Audit Department [50].

**Table S2.** Percentage of specialists' resignation from ten FPP hospitals, 2015-2017.

| Year  | No. of specialists' resignation |                           |                |
|-------|---------------------------------|---------------------------|----------------|
|       | Total (MOH)                     | Total 10 FPP<br>Hospitals | Percentage (%) |
| 2015  | 165                             | 59                        | 35.8           |
| 2016  | 158                             | 46                        | 29.1           |
| 2017  | 170                             | 52                        | 30.6           |
| Total | 493                             | 157                       | 31.8           |

Source: National Audit Department [50].

**Table S3.** The trend of specialists' resignation rate in MOH, Putrajaya Hospital and Selayang Hospital, 2014-2016.

| Year                  | 2014                        |                     | 2015                        |                     | 2016                        |                  |
|-----------------------|-----------------------------|---------------------|-----------------------------|---------------------|-----------------------------|------------------|
|                       | Total<br>number<br>resigned | Resignation<br>rate | Total<br>number<br>resigned | Resignation<br>rate | Total<br>number<br>resigned | Resignation rate |
| MOH                   | 144                         | 3.6%                | 164                         | 3.9%                | 158                         | 3.5%             |
| Putrajaya<br>Hospital | 1                           | 1.2%                | 3                           | 3.5%                | 2                           | 2.2%             |
| Selayang<br>Hospital  | 6                           | 3.4%                | 9                           | 5.1%                | 10                          | 5.1%             |

Source: Amir et al. [61].

**Table S4.** Total number of non-FPP MOH specialists, FPP MOH specialists, and private facilities' specialists and percentage of increment by year, 2017-2018.

| Year | Non-FPP MOH<br>specialists                     |                                           | FPP MOH specialists |                                           | Private specialists |                                           |
|------|------------------------------------------------|-------------------------------------------|---------------------|-------------------------------------------|---------------------|-------------------------------------------|
|      | Total No.<br>(excluding<br>FPP<br>specialists) | Percentage<br>of increment<br>by year (%) | Total No.           | Percentage<br>of increment<br>by year (%) | Total No.           | Percentage<br>of increment<br>by year (%) |
|      |                                                |                                           |                     |                                           |                     |                                           |
| 2017 | 6,601                                          | 1.7                                       | 342                 | 8.6                                       | 4,741               | 6.1                                       |
| 2018 | 6,461                                          | -2.1                                      | 360                 | 5.3                                       | 4,865               | 2.6                                       |

Source: Health Planning Division, Ministry of Health Malaysia [31], Fadzil et al. [60].

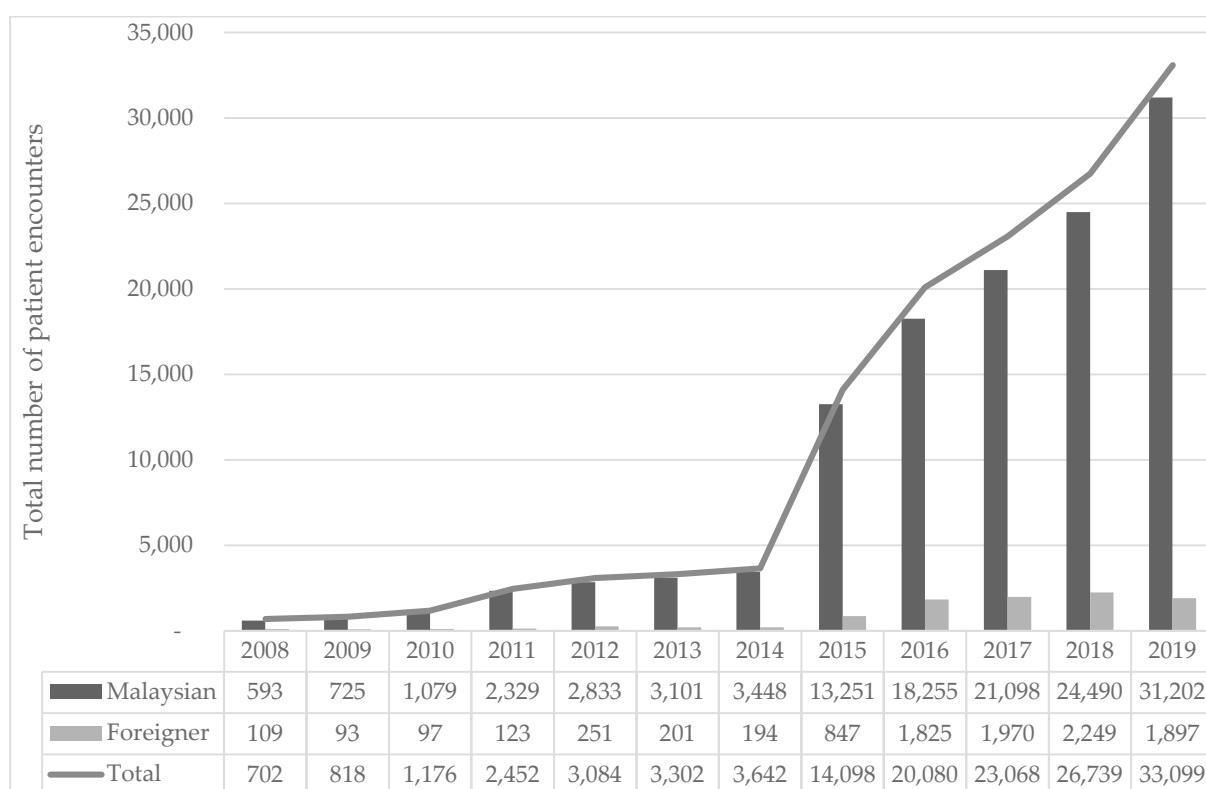

**Figure S1:** Trend of FPP patients' encounters, 2008-2019. Source: Fadzil et al. [60].

**Table S5.** Total number of non-FPP, FPP and private patients' encounters and percentage of increment by year, 2017–2019.

| Year | Non-FPP patients' encounters at all 146 MOH hospitals (inpatient, outpatient, daycare) |                                     | FPP patients' encounters at 10 FPP hospitals (inpatient, outpatient, daycare) |                                     | Private patients' encounters at private hospitals (inpatient, outpatient) |                                     |
|------|----------------------------------------------------------------------------------------|-------------------------------------|-------------------------------------------------------------------------------|-------------------------------------|---------------------------------------------------------------------------|-------------------------------------|
|      | Total No.                                                                              | Percentage of increment by year (%) | Total No.                                                                     | Percentage of increment by year (%) | Total No.                                                                 | Percentage of increment by year (%) |
| 2017 | 24,744,818                                                                             | -1.1                                | 23,068                                                                        | 14.9                                | 4,714,685                                                                 | -3.7                                |
| 2018 | 25,949,686                                                                             | 4.9                                 | 26,739                                                                        | 15.9                                | 4,916,437                                                                 | 4.3                                 |
| 2019 | 26,449,323                                                                             | 1.9                                 | 33,099                                                                        | 23.8                                | 4,719,336                                                                 | -4.0                                |

Source: Ministry of Health Malaysia [38,62-65], Fadzil et al. [60].

**Table S6.** The percentage of FPP patients' encounters in ten FPP hospitals, 2017-2019.

| Year | Total No. of patients' encounters in MOH hospitals (inpatients, outpatients, daycare) | Total No. of FPP patients' encounters in 10 FPP hospitals (inpatients, outpatients, daycare) | Percentage (%) of FPP patients' encounters in 10 FPP hospitals |
|------|---------------------------------------------------------------------------------------|----------------------------------------------------------------------------------------------|----------------------------------------------------------------|
| 2017 | 24,767,886                                                                            | 23,068                                                                                       | 0.09                                                           |
| 2018 | 25,976,425                                                                            | 26,739                                                                                       | 0.10                                                           |
| 2019 | 26,482,422                                                                            | 33,099                                                                                       | 0.13                                                           |

Source: Ministry of Health Malaysia [38,62-65], Fadzil et al. [60].
